# Supplementary material for: Ferrocene-sensitized titanium-oxo clusters with effective visible light absorption and excellent photoelectrochemical activity
Source: Royal Society of Chemistry journal article supplement (doi:10.1039/d1qi01410b), 2022-01-01
Supplement: d1qi01410b1.pdf [file d1qi01410b1.pdf]

## Electronic Supporting Information

### **Ferrocene-Sensitized Titanium-Oxo Clusters with Effective Visible Light Absorption and Excellent Photoelectrochemical Activity**

Chao Wang,<sup>\*a</sup> Shou Juan Wang,<sup>a</sup> Fan Gong Kong<sup>a</sup> and Ning Chen<sup>a</sup>

State Key Laboratory of Biobased Material and Green Papermaking, Qilu University of  
Technology, Shandong Academy of Sciences, No. 3501 University Road, Jinan,  
250353, China, *E-mail: wangchao@qlu.edu.cn.*

## 1. Crystallographic details

**Table S1. X-ray measurements and structure solution of clusters  $\text{Ti}_8\text{Fcdc}_4$  and  $\text{Ti}_{10}\text{Fcdc}_2$ .**

| Compound                                         | $\text{Ti}_8\text{Fcdc}_4$                                       | $\text{Ti}_{10}\text{Fcdc}_2$                          |
|--------------------------------------------------|------------------------------------------------------------------|--------------------------------------------------------|
| Empirical formula                                | $\text{C}_{48}\text{H}_{71}\text{Fe}_2\text{NO}_{18}\text{Ti}_4$ | $\text{C}_{36}\text{H}_{68}\text{FeO}_{19}\text{Ti}_5$ |
| Formula weight                                   | 1253.35                                                          | 1100.25                                                |
| Crystal system                                   | monoclinic                                                       | triclinic                                              |
| Space group                                      | $\text{P}2_1/\text{n}$                                           | $\text{P}-1$                                           |
| $a/\text{\AA}$                                   | 15.9048(2)                                                       | 11.7193(5)                                             |
| $b/\text{\AA}$                                   | 20.4727(3)                                                       | 12.4105(5)                                             |
| $c/\text{\AA}$                                   | 18.7454(2)                                                       | 19.4298(8)                                             |
| $\alpha/^\circ$                                  | 90                                                               | 89.007(3)                                              |
| $\beta/^\circ$                                   | 92.8146(13)                                                      | 72.474(3)                                              |
| $\gamma/^\circ$                                  | 90                                                               | 68.293(3)                                              |
| V                                                | 6096.41(16)                                                      | 2489.50(19)                                            |
| Z                                                | 4                                                                | 2                                                      |
| $\rho_{\text{calc}}/\text{g}\cdot\text{cm}^{-3}$ | 1.366                                                            | 1.468                                                  |
| $\mu_{(\text{MoK}\alpha)}/\text{mm}^{-1}$        | 8.504                                                            | 9.364                                                  |
| F(000)                                           | 2600.0                                                           | 1144.0                                                 |
| Data/restraints<br>/parameters                   | 12166/302/789                                                    | 9201/44/602                                            |
| $R_1/wR_2$ ( $I > 2\sigma(I)$ ) <sup>a</sup>     | 0.0626/0.1816                                                    | 0.0672/0.1871                                          |
| $R_1/wR_2$ (all data) <sup>a</sup>               | 0.0882/0.2038                                                    | 0.0804/0.2032                                          |
| GooF (all data) <sup>b</sup>                     | 1.025                                                            | 1.001                                                  |

$$^a R_1 = \sum ||F_o| - |F_c|| / \sum |F_o|; wR_2 = \{ \sum w[(F_o)^2 - (F_c)^2]^2 / \sum w[(F_o)^2]^2 \}^{1/2}$$

$$^b \text{GooF} = \{ \sum w[(F_o)^2 - (F_c)^2]^2 / (n-p) \}^{1/2}$$

## 2. Synthetic route of the clusters

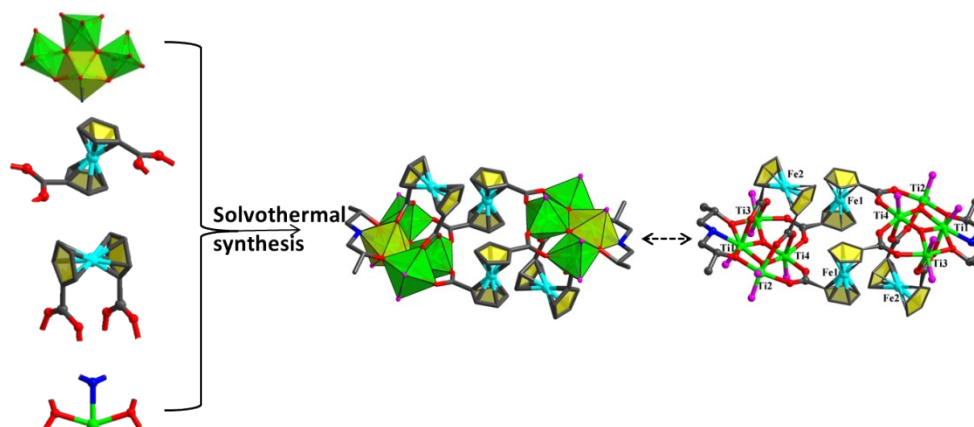

**Fig. S1.** The assembly of the core structure of the  $\text{Ti}_8\text{Fcdc}_4$  cluster shows a polyhedron in the metal center.

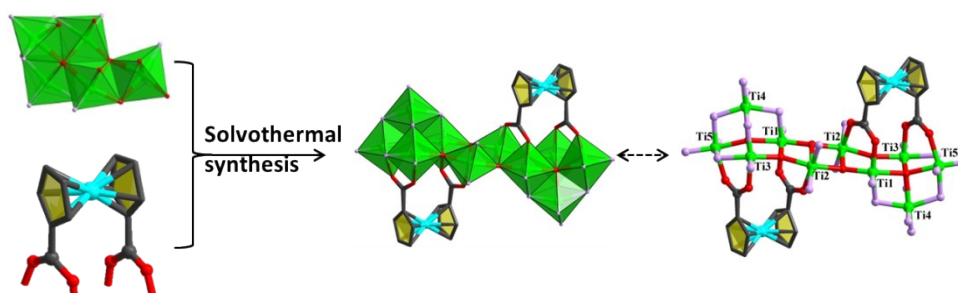

**Fig. S2.** The assembly of the core structure of the  $\text{Ti}_{10}\text{Fcdc}_2$  cluster shows a polyhedron in the metal center.

## 3. Structure of the clusters

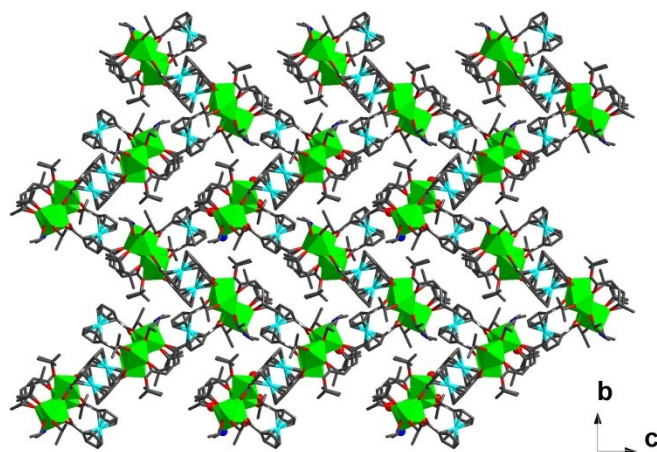

**Fig. S3.** Three-dimensional supramolecular stacking of  $\text{Ti}_8\text{Fcdc}_4$  cluster.

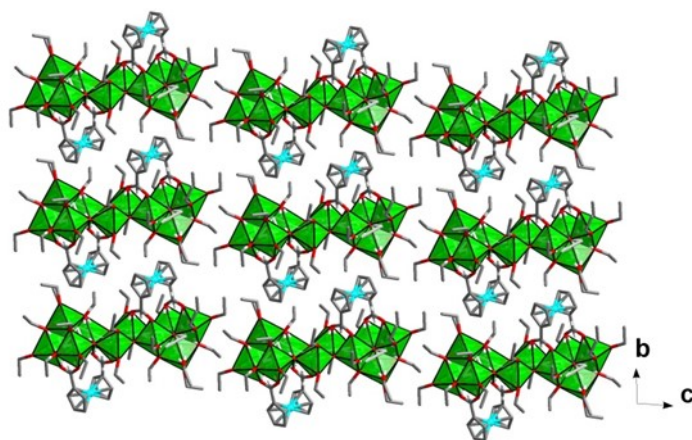

**Fig. S4.** Three-dimensional supramolecular stacking of  $\text{Ti}_{10}\text{Fcdc}_2$  cluster.

#### 4. Powder X-ray diffraction

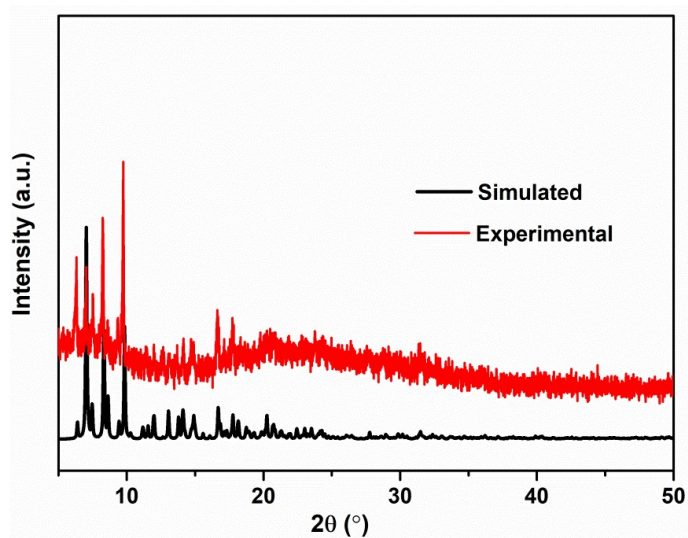

**Fig. S5.** The XRD patterns of cluster  $\text{Ti}_8\text{Fcdc}_4$  cluster.

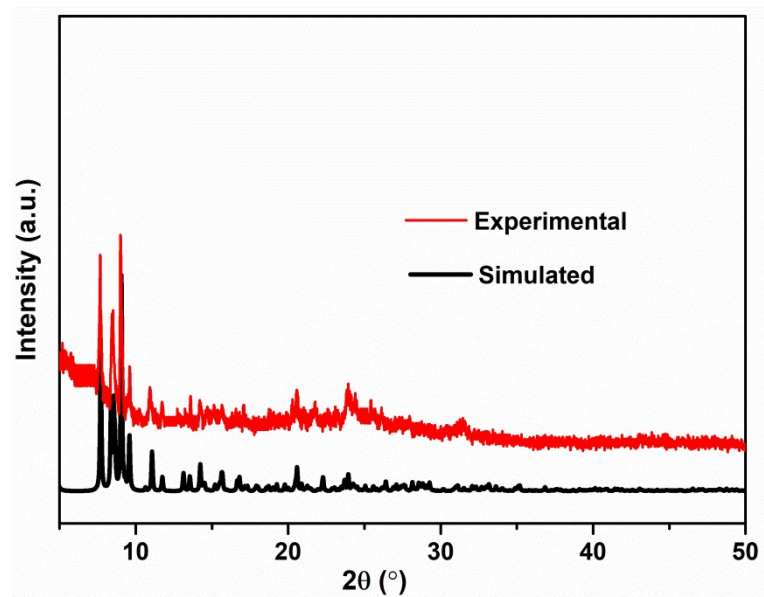

**Fig. S6.** The XRD patterns of cluster  $\text{Ti}_{10}\text{Fcdc}_2$  cluster.

### 5. TG-Measurement

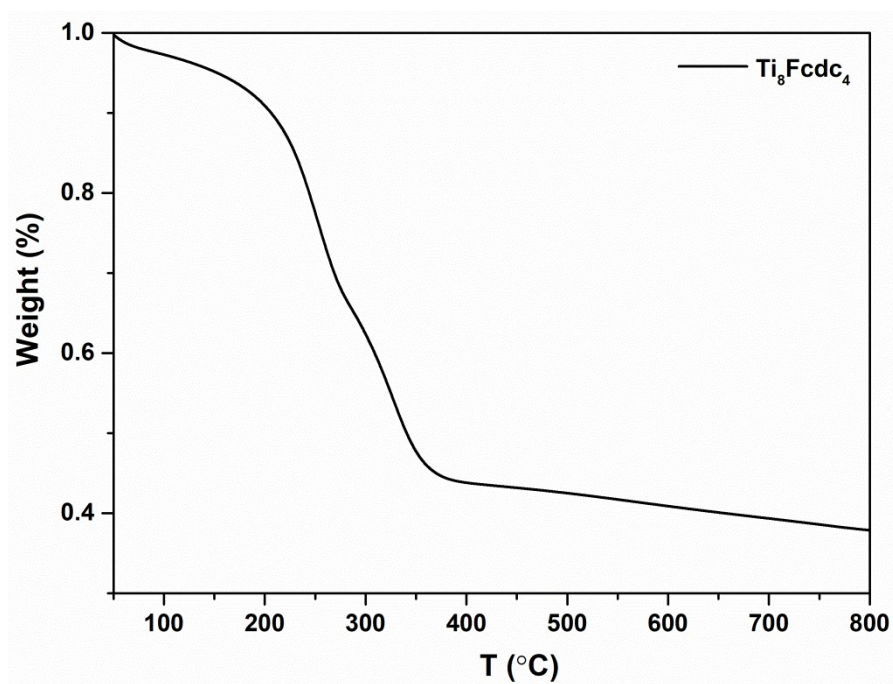

**Fig. S7.** Thermal decomposition curve of  $\text{Ti}_8\text{Fcdc}_4$  cluster.

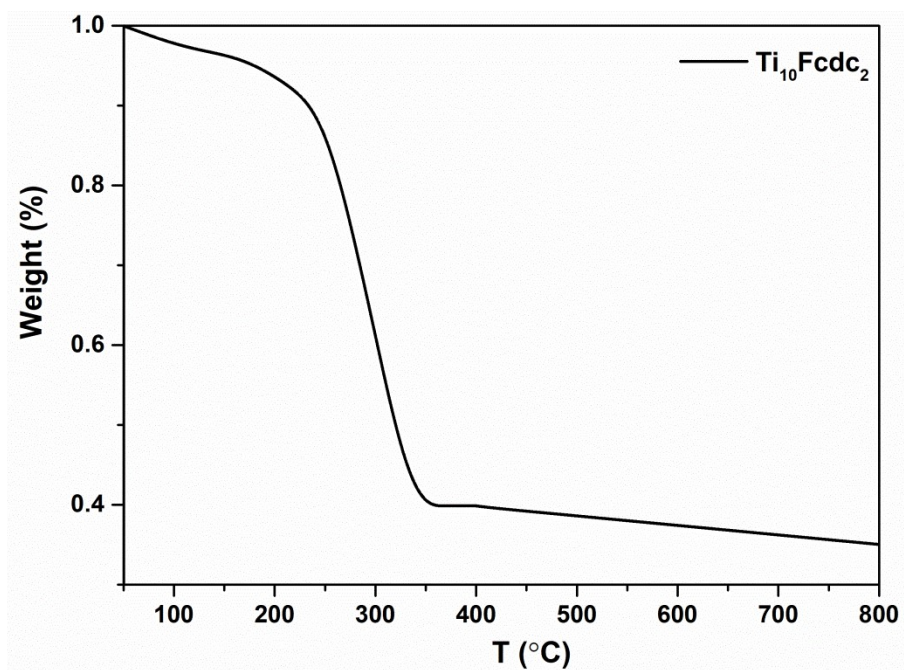

**Fig. S8.** Thermal decomposition curve of  $\text{Ti}_{10}\text{Fcdc}_2$  cluster.

## 6. FT-IR spectra

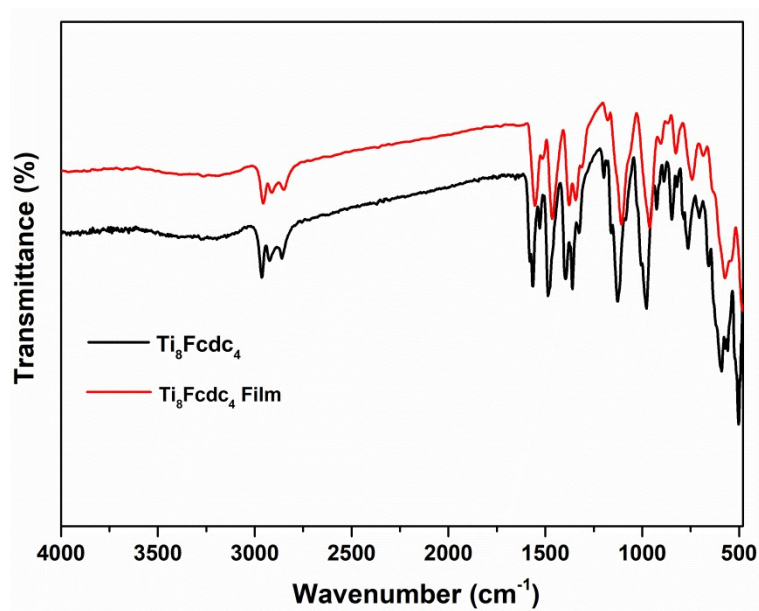

**Fig. S9.** IR spectra of  $\text{Ti}_8\text{Fcdc}_4$  cluster and the sample after photoelectrochemical experiment.

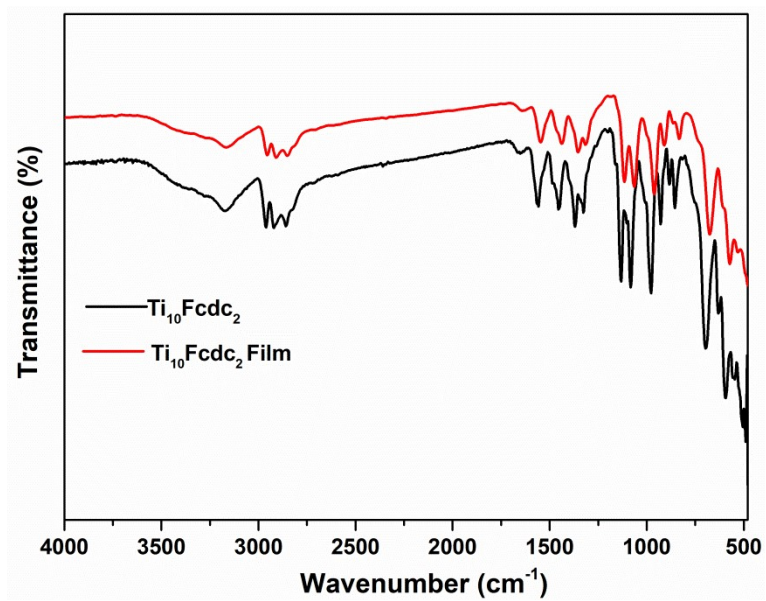

**Fig. S10.** IR spectra of **Ti<sub>10</sub>Fcdc<sub>2</sub>** cluster and the sample after photoelectrochemical experiment.
